# Supplementary material
Source: PubMed Central journal article supplement (PMC7492011)
Supplement: mmc1.pdf [file mmc1.pdf]

# THE LANCET

## Infectious Diseases

### Supplementary appendix

This appendix formed part of the original submission and has been peer reviewed. We post it as supplied by the authors.

Supplement to: Gatalo O, Tseng K, Hamilton A, Lin G, Klein E, for the CDC MInD-Healthcare Program. Associations between phone mobility data and COVID-19 cases. *Lancet Infect Dis* 2020; published online Sept 15. [https://doi.org/10.1016/S1473-3099\(20\)30725-8](https://doi.org/10.1016/S1473-3099(20)30725-8).

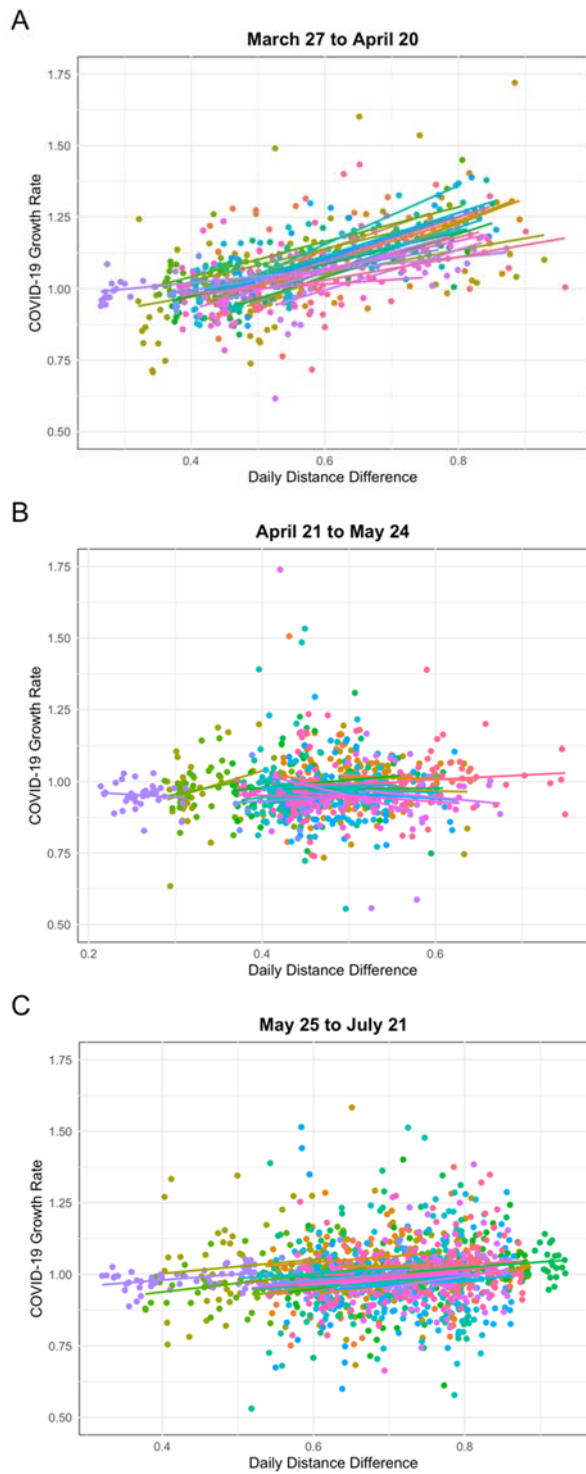

Figure 1: Relationship between daily distance phone mobility metric and growth rate of cases in 25 counties. Correlations between Daily Distance Traveled and the growth rate of cases was calculated for three time periods for 25 counties in the United States: A) March 27<sup>th</sup> to April 20<sup>th</sup>; B) April 21<sup>st</sup> to May 24<sup>th</sup>; and C) May 25<sup>th</sup> to July 21<sup>st</sup>.
